## Register rerum ad Vol. 22

Fecit WILHELM BAUMANN, Zürich

- Allopurinol, prophylaxis of uric acid lithiasis, 506  
Ampicillin concentration in prostatic tissue, 453  
Amyloidosis, acute renal failure, 390  
Anurie bei Nierenblutung wegen Gerinnungsstörung, 399  
Bladder, enlargement and substitution, 84  
–, rectal, 1, 29, 47  
Blasenhal, Suspension bei Inkontinenz, 185  
Blasenhalplastik bei Prostatektomie, 227  
Blasenulkus nach Radiumbestrahlung, 429  
Calcio urinario, Tirocalcitonina, 285  
Cálculos urinarios, composición, 178  
Calculs d'acide urique, 193, 492, 506  
– – –, analyse de la structure, 193  
Calculs rénaux, classement des porteurs, 473  
– –, dissolution chimique, 155  
Carcinome du col, ulcère radique, 429  
Cateterismo permanente ureteral, 366  
Catheterization by paraplegic patients, 236  
Cervical cancer, vesical ulcer following X-irradiation, 429  
Circulación renal después de la nefrectomía, 250  
Colostomia analis, 29, 47  
Congenital ureterectasis, study of the nerve fibres, 414  
Corticoides, prevención de las estrecheces de las vías urinarias, 215  
Cystectomy totalis, 1, 29, 47, 332, 435, 446  
Cystectomy, ureters in the prevesical space, 332  
Dysglobulinemia, acute renal failure, 390  
Ersatzblase, Absorption der Harnbestandteile, 435  
Extravasación peripélvica, 342  
Fibrinolytische Aktivität des Harnes, 208  
Fistulas y defectos de la uretra, 461  
Harnblase, Erweiterung und Ersatz, 84  
Harnleiter-Darm-Implantation, Sigma-myotomie, 446  
Harnröhre, Fisteln und Defekte, 461  
Harnsäuresteinbildung, 193, 492, 506  
Harnsäuresteine, 193  
Harnstoffanstieg nach Prostataoperationen, 312  
Harnverhaltung bei Herpes zoster, 222  
Hématurie, activité fibrinolytique de l'urine, 208  
Hemorrhagic diathesis, hematuria with anuria, 399  
Hémorragie rénale due à des troubles de coagulation, 399  
Herpes zoster, causa de retención urinaria, 222  
Hiperparatiroidismo primario con urolitiasis, 517  
Hodentumoren bei eineiigen Zwillingen, 353  
Hypercalcaemia, Tyreocalcitonin, 285  
Hyperparathyroidisme primaire et lithiase urinaire, 517  
Hypertrophie de la prostate, culture bactérienne, 167  
Implantación uretero-intestinal, sigma-miotomía, 446  
Incontinence à l'effort, Marshall-Marchetti, 324, 185  
Insuffisance rénale aigue lors de dysglobulinémie, 390  
Intestinal loops, absorption of urine products, 435  
Jumeaux, tumeurs testiculaires, 353  
Kidney, intrarenal pressure, 155  
–, Mannitol in ischemia, 381  
–, methods of preservation, 258  
–, salt and water levels, 533  
Lithiase urinaire et hyperparathyroidisme primaire, 517  
Lithiasis, extravasation pélvienne, 342  
Litiásicos, clasificación, 473

- Litiasis renal, quimiolisis, 155  
 – urica, análisis estructural, 193  
 Litogénesis urica, 193, 492, 506  
 Mannitol bei ischämisch geschädigten  
   Rattennieren, 381  
 Marshall-Marchetti, 185, 324  
 Meatoplastia, 468  
 Mégauretères, étude des fibres nerveu-  
   ses, 414  
 Métabolisme du sel et de l'eau du  
   malade rénal, 532  
 Multiple myeloma, acute renal failure,  
   390  
 Nephrectomy, renal blood perfusion, 250  
 Nephritis chronica interstitialis, 68  
 Nephrolithiasis, classification of indi-  
   viduals, 473  
 –, dissolutio, 155  
 –, peripelvic extravasation, 342  
 –, Thyreocalcitonin, 285  
 –, X-ray analysis, 193  
 Niere, Blutung bei Gerinnungsstörung,  
   399  
 –, Durchblutung nach einseitiger  
   Nephrektomie, 250  
 –, intrarenale Druckverhältnisse, 155  
 –, Konservierungsverfahren, 258  
 –, Mannitol bei Ischämie, 381  
 –, Salz- und Wasserhaushalt, 532  
 –, Tumoren bei tuberöser Hirnsklerose,  
   406  
 –, Versagen bei Dysglobulinämien, 390  
 Nierensteinchemolyse, 155  
 Nierensteinträger, Klassifizierung, 473  
 Orina, actividad fibrinolítica, 208  
 Paraplegic patients, intermittent  
   catheterization, 236  
 Peripelvine Extravasation bei Ureter-  
   steinen, 342  
 Phäochromocytom, Blutdruckkontrolle  
   nach Entfernung, 301  
 Pheochromocytoma, blood pressure  
   control after the removal, 301  
 Phosphothérapie de la lithiase urinaire,  
   483, 506  
 Plastik du col et prostatectomie, 227  
 Plastic surgery on urinary tract, 215  
 Prostata, Harnstoffanstieg nach Opera-  
   tionen, 312  
 Prostataadenom, Bakteriurie, 167  
 Prostatagewebe, Ampicillin-Konzentra-  
   tion, 453  
 Prostatectomy with vesical neck plasty,  
   227  
 Prostatic hyperplasia, bacteriuria, 167  
 Prostatic operations, rise of blood urea,  
   312  
 Pyelonephritis xanthogranulomatosis, 68  
 Reflux vésico-urétéral chez l'adult, 124  
 Reflux vésico-urétéral chez l'enfant, 97,  
   141  
 Rein, circulation après néphrectomie,  
   250  
 –, examen microscopique, 258  
 –, la pression intra-pyélique, 155  
 –, Mannitol et lésions ischémiques, 381  
 –, métabolisme du sel et de l'eau, 532  
 Rektumblase, 1, 29, 47  
 Renal calculus, chemical dissolution,  
   155  
 – disease, salt and water levels, 532  
 – leiomyosarcoma and tuberous scle-  
   rosis, 406  
 Rétention urinaire et herpes zoster, 222  
 Retropubic suspension, 185, 324  
 Riñón, conservación, 258  
 –, insuficiencia aguda en las disglabu-  
   linemias, 390  
 –, la presión intrarenal, 155  
 –, Manitol en las lesiones isquémicas,  
   381  
 –, metabolismo hídrico y mineral, 532  
 Salz- und Wasserhaushalt des Nieren-  
   kranken, 532  
 Sclérose cérébrale tubéreuse et tumeurs  
   rénales, 406  
 Sondages vésicaux chez les paraplé-  
   giques, 236  
 Sondes urétérales de longue durée, 366  
 Stress incontinence, retropubic suspen-  
   sion, 185, 324  
 Strikturen nach plastischen Opera-  
   tionen am Harntrakt, 215  
 Suspensio retropubica, 185, 324  
 Testiculo, tumores concordantes en  
   gemelos, 353  
 Thyreocalcitonin, urinary calcium  
   homeostasis, 285  
 Tuberous sclerosis, renal leiomyo-  
   sarcoma, 406  
 Tumores renales en la esclerosis cerebral  
   tuberosa, 406

- Twins, concordant tumors of the testicles, 353
- Ulceras vesicales tras el Röntgenterapia, 429
- Uraemia postoperatoria, 312
- Urée du sang après des opérations sur la prostate, 312
- Ureteral catheterization, 366
- Urétérectasie congénitale, étude des fibres nerveuses, 414
- Uretero-intestinal implantation, sigmoidal myotomia, 446
- Uretère, opérations plastiques, 425, 435
- Uretersonden, Untersuchungen nach längerer Liegedauer, 366
- Urethra, fistulae and mural defects, 461  
–, meatoplastia, 468
- Uric acid calculi, 193  
– – lithiasis, 193, 492, 506  
– – lithiasis, prophylaxis by Allopurinol, 506
- Urinary calculi, composition, 178  
– calcium homeostasis, Thyrocalcitonin, 285  
– fibrinolytic activity, 208  
– retention with herpes zoster, 222  
– tract, plastic surgery, 215
- Urolithiasis, phosphate therapy, 483
- Urolithiasis, Röntgenstruktur, Lösbarkeit, 193
- Vesical neck, aponeurotic suspension, 185  
– neck, plasty and prostatectomy, 227  
– ulcer following X-irradiation, 429
- Vesico-ureteral reflux in adults, 124  
– – in children, 97, 141
- Vessie, opérations plastiques, 84  
– plastique, réabsorption des constituants urinaires, 435  
– rectale, 1, 29, 47  
–, suspension aponévrotique du col, 185  
–, ulcère radique, 429
- Vejiga rectal, 1, 29, 47  
–, suspensión aponeurótica del cuello, 185
- Xanthogranulomatous pyelonephritis, 68
- Zwillinge, konkordante Hodentumoren, 353
